# Supplementary material
Source: PubMed Central journal article supplement (PMC2677965)
Supplement: NIHMS106118-supplement-suppl_Figure_3.pdf [file NIHMS106118-supplement-suppl_Figure_3.pdf]

a) *TRPA1*<sup>+/+</sup>

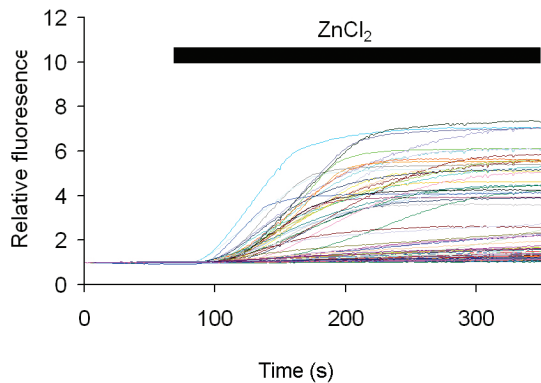

b) *TRPA1*<sup>-/-</sup>

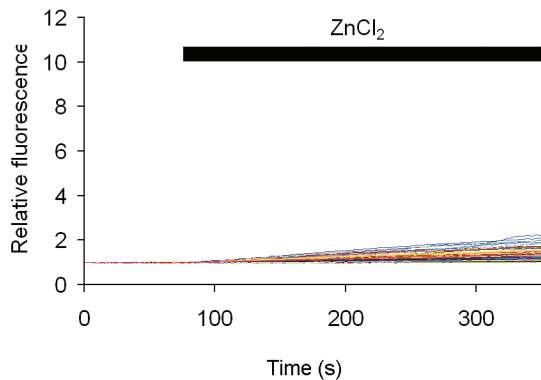

c)

>3 fold increase with 300  $\mu$ M ZnCl<sub>2</sub>

>3 fold increase with 30  $\mu$ M ZnCl<sub>2</sub>

*TRPA1*<sup>+/+</sup>

17.5% (83/476)

2.8% (11/382)

*TRPA1*<sup>-/-</sup>

0% (0/743)

0% (0/373)
