# Supplementary material
Source: PubMed Central journal article supplement (PMC2677965)
Supplement: NIHMS106118-supplement-suppl_Figure_6.pdf [file NIHMS106118-supplement-suppl_Figure_6.pdf]

|        |                                                                                                                             |      |
|--------|-----------------------------------------------------------------------------------------------------------------------------|------|
| hTRPA1 | MKRSLRKMWRPGEKKEPQGVVYEDVPDDTEDFKESLKVVFEGSAYGLQNFNK-QKKLKR                                                                 | 119  |
| mTRPA1 | MKRGLRRIILLPEERKEVQGVVYRGVGEDMDCSKESFKVDIEGDMCRLEDFIKNRRKLSKYEDENLCLPHHAAAEGQVELMELIINGSSCEVLNIMDGYGNTPLHCAAQVEKNQIESVKFLLS | 120  |
| hTRPA1 | RGANPNLRNRFNMMAPI                                                                                                           | 239  |
| mTRPA1 | QGANPNLRNRNMMSPLHIAVHGMYNEVIKVLTEHKATNINLEGENGNTALMSTCAKDNSEALQILLEKGAKLCKSNKWGDYYPVHQAAFSGAKCMELILAYGEKNGYSRETHINFMNNGK    | 240  |
| hTRPA1 | ATPI                                                                                                                        | 359  |
| mTRPA1 | ASPLHLAVQSGDLDMIKMCLDNGAQIDPVEKGRCTAIFAAATQGATEIVKLMISSYSGSVDIVNTTDGCHETMIRASLFDHELADYLI SVGADINKIDSEGRSPLILATASASWNIVN     | 360  |
| hTRPA1 | LLLSKGAQVDIKDNFGRNFI                                                                                                        | 479  |
| mTRPA1 | LLLCKGAKVDIKDHLGRNFLHLTVQQPYGLRNLNLRPEFQMOMQHIKELVMDEDNDGCTPIHYARQGGPGSVNNLLGFNVSIHSSKSKDKKSPHFAASYGRINTCQRLLQDISDTRLLNEGD  | 480  |
| hTRPA1 | LHGMP                                                                                                                       | 599  |
| mTRPA1 | LHGMPHLHAAKNGHDKVVQLLLKKGALFLSDHNGWTALHSHASMGGYTQTMKVILDTNLKCTDRLDDEGNTALHFAAREGHAKAVALLSINADIVLNKQASFLHIALHNKRKEVVLT       | 600  |
| hTRPA1 | IRSKRWDF                                                                                                                    | 718  |
| mTRPA1 | IRNKRWDECLQVFTHNSPSNRCPIEMEMVEYLPECMKVLDFCMIPSTEDKSCRDYIIEYNFKYLQCPLEFTKKT-PTQDVIYEPLTALNAMVQNNRIELLNHPVCKEYLLMKWLAYGFRA    | 720  |
| hTRPA1 | HMMNLGSY                                                                                                                    | 837  |
| mTRPA1 | HMMNLGSYCLGLIPMTLLVVKIQPGMAFNSTGIINGTSSTHEERIDTLNSFPIKICMILVFLSSIFGYCKEVIQIFQQRNYFLDYNNALEWVIYTTSGIIFVLPLFLNIPAYMQWQCGAI    | 840  |
| hTRPA1 | AVYFYWMN                                                                                                                    | 957  |
| mTRPA1 | AIFYFYWMNLLYLQRFENCGIFIVMLEVIFKTLRSTGVFI FLLAFGLSFYVLLNFQDAFSTPLLSLIQTFSMMLGDINRYDAFLEPLFRNELAYPVLTFGQLIAFTMFVPIVLMNLLI     | 960  |
| hTRPA1 | GLAVGDIAEVQK                                                                                                                | 1077 |
| mTRPA1 | GLAVGDIAEVQKHASLKRIAMQVELHTNLEKKLPLWYLRKVDQKSTIVYPNRPGRMLRFFHYFLNMQETRQEVPNIDTCLEMEILKQKYRLKDLTSLLEKQHELIKLIQKMEIISE        | 1079 |
| hTRPA1 | TEDDSS                                                                                                                      | 1119 |
| mTRPA1 | TEDEDNHCSFQDRFKKERLEQMHSKWNFVLNAVKTCTHCSISHPDF                                                                              | 1125 |

- Wild-type like responses
- All compound responses are affected
- No response to all compounds
- Zinc response is more affected
- Zinc response is specifically affected
