# Supplementary material
Source: PubMed Central journal article supplement (PMC2677965)
Supplement: NIHMS106118-supplement-suppl_Table_1.pdf [file NIHMS106118-supplement-suppl_Table_1.pdf]

## Plate #1

Zinc

FFA

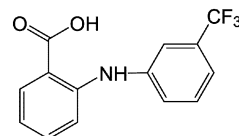

CA

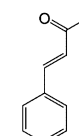

| Clones           | EC50       | nHill     | Emax | EC50       | nHill     | Emax  | EC50       | nHill     | Emax  |
|------------------|------------|-----------|------|------------|-----------|-------|------------|-----------|-------|
| hTRPA1-WT        | 1.7+/-0.1  | 1.5+/-0.2 | 100  | 2.3+/-0.1  | 1.4+/-0.1 | 100   | 18.5+/-1.4 | 1.7+/-0.2 | 100   |
| C621S            | 1.1+/-0.1  | 2.2+/-0.7 | 72.3 | 5.5+/-0.5  | 1.0+/-0.1 | 92.9  | 82.3+/-5.4 | 1.5+/-0.1 | 73    |
| C641S            | 4.0+/-0.3  | 1.5+/-0.1 | 82.3 | 5.8+/-0.5  | 1.5+/-0.2 | 119.1 | 25.4+/-1.8 | 1.4+/-0.1 | 116.5 |
| C665S            | 2.6+/-0.2  | 1.3+/-0.1 | 92.7 | 3.9+/-0.4  | 1.4+/-0.2 | 120   | 83.5+/-5.7 | 1.7+/-0.2 | 108.9 |
| H983A            | N.D.       | N.D.      | N.D. | 15.5+/-0.6 | 2.4+/-0.2 | 113.5 | 57.4+/-2.6 | 2.1+/-0.2 | 70    |
| C1021S           | 5.8+/-0.8  | 1.5+/-0.3 | 46.2 | 1.7+/-0.2  | 1.3+/-0.2 | 103.1 | 15.3+/-0.6 | 1.6+/-0.1 | 100.3 |
| C641S/<br>C1021S | 14.1+/-4.1 | 0.9+/-0.2 | 27.8 | 3.8+/-0.3  | 1.4+/-0.2 | 116.7 | 16.2+/-1.1 | 1.4+/-0.1 | 117.8 |

## Plate #2

Zinc

FFA

CA

| Clones     | EC50      | nHill     | Emax | EC50      | nHill     | Emax | EC50        | nHill     | Emax |
|------------|-----------|-----------|------|-----------|-----------|------|-------------|-----------|------|
| hTRPA1-WT  | 1.0+/-0.1 | 1.6+/-0.3 | 100  | 0.9+/-0.2 | 1.5+/-0.4 | 100  | 8.8+/-1.7   | 1.3+/-0.3 | 100  |
| Triple cys | 4.1+/-0.7 | 0.9+/-0.1 | 53.2 | 8.9+/-0.8 | 1.5+/-0.2 | 86.9 | 122.7+/-4.4 | 2.4+/-0.2 | 63.3 |
