# Supplementary material
Source: PubMed Central journal article supplement (PMC2677965)
Supplement: NIHMS106118-supplement-suppl_Table_2.pdf [file NIHMS106118-supplement-suppl_Table_2.pdf]

Supplemental Table 2, Hu et al.

**Statistics for cysteine mutants**

| Plate #1<br>Clones | Zinc             |         |                  | FFA              |         |                  |
|--------------------|------------------|---------|------------------|------------------|---------|------------------|
|                    | EC <sub>50</sub> | nHill   | E <sub>max</sub> | EC <sub>50</sub> | nHill   | E <sub>max</sub> |
| hTRP1-WT           | 3.6±0.3          | 1.7±0.2 | 100              | 1.7±0.5          | 1.1±0.3 | 100              |
| C59S               | 2.9±0.3          | 1.6±0.2 | 89.7             | 1.7±0.3          | 1.3±0.3 | 95.2             |
| C104S              | 3.4±0.2          | 1.3±0.1 | 87.4             | 1.9±0.3          | 1.3±0.3 | 95.1             |
| C173S              | 3.4±0.5          | 1.2±0.2 | 91.1             | 2.4±0.3          | 0.9±0.1 | 107.2            |
| C192S              | 3.5±0.7          | 1.3±0.3 | 88.9             | 2.5±0.4          | 1.1±0.2 | 127.5            |
| C199S              | 4.3±0.7          | 1.5±0.3 | 88.2             | 2.2±0.3          | 1.1±0.1 | 104.8            |
| C213S              | 4.4±0.3          | 1.5±0.1 | 88.8             | 3.3±0.6          | 1.1±0.2 | 112.4            |
| C258S              | 5.2±0.4          | 1.2±0.1 | 82.9             | 2.5±0.5          | 1.0±0.2 | 91.5             |
| C273S              | 3.2±0.3          | 1.4±0.2 | 95.8             | 2.6±0.6          | 1.0±0.2 | 105.1            |
| C308S              | 6.3±0.4          | 1.1±0.1 | 88.2             | 2.8±0.7          | 1.1±0.3 | 109.5            |
| C414S              | ND               | ND      | ND               | ND               | ND      | ND               |

| Plate #2<br>Clones | Zinc             |         |                  | FFA              |         |                  |
|--------------------|------------------|---------|------------------|------------------|---------|------------------|
|                    | EC <sub>50</sub> | nHill   | E <sub>max</sub> | EC <sub>50</sub> | nHill   | E <sub>max</sub> |
| hTRP1-WT           | 1.8±0.4          | 1.5±0.5 | 100              | 1.8±0.3          | 1.6±0.3 | 100              |
| C421S              | 2.0±0.2          | 1.0±0.1 | 18               | 10.3±1.9         | 1.1±0.2 | 56.1             |
| C462S              | 3.2±0.3          | 1.5±0.4 | 81.3             | 2.1±0.2          | 1.2±0.1 | 84.7             |
| C540S              | 4.1±0.8          | 1.8±0.5 | 91.7             | 4.4±1.1          | 1.3±0.3 | 107.1            |
| C608S              | 3.0±0.3          | 1.3±0.4 | 127.3            | 2.0±0.3          | 1.2±0.2 | 119.2            |
| C633S              | 3.4±0.6          | 1.6±0.7 | 97.3             | 3.3±0.4          | 1.0±0.1 | 110.6            |
| C651S              | 3.3±0.5          | 1.7±0.7 | 119.7            | 2.1±0.2          | 1.5±0.2 | 107.7            |
| C703S              | 3.4±0.7          | 1.4±0.4 | 94.7             | 1.6±0.2          | 1.6±0.3 | 94.8             |

| Plate #3<br>Clones | Zinc             |         |                  | FFA              |         |                  |
|--------------------|------------------|---------|------------------|------------------|---------|------------------|
|                    | EC <sub>50</sub> | nHill   | E <sub>max</sub> | EC <sub>50</sub> | nHill   | E <sub>max</sub> |
| hTRP1-WT           | 3.1±0.7          | 1.3±0.4 | 100              | 3.6±0.9          | 1.8±0.5 | 100              |
| C727S              | 5.3±0.5          | 1.6±0.2 | 36.7             | 7.6±2.9          | 1.1±0.3 | 53.7             |
| C773S              | 4.2±1.5          | 1.5±0.7 | 19.9             | 8.4±2.7          | 1.3±0.5 | 56.5             |
| C786S              | 3.2±0.2          | 1.6±0.2 | 93.7             | 2.2±0.2          | 1.2±0.2 | 107.4            |
| C834S              | 2.9±0.4          | 1.3±0.3 | 95.5             | 2.1±0.5          | 1.4±0.5 | 105.8            |
| C856S              | 3.2±0.3          | 1.8±0.5 | 98.4             | 1.9±0.8          | 1.1±0.3 | 98               |
| C1025S             | 3.0±0.2          | 1.4±0.1 | 88.1             | 4.0±1.7          | 1.5±0.4 | 115.2            |
| C1085S             | 3.2±0.5          | 1.3±0.3 | 96.2             | 3.2±1.0          | 1.2±0.3 | 124.2            |

**statistics for histidine mutants**

| Plate #1<br>Clones | Zinc             |         |                  | FFA              |         |                  |
|--------------------|------------------|---------|------------------|------------------|---------|------------------|
|                    | EC <sub>50</sub> | nHill   | E <sub>max</sub> | EC <sub>50</sub> | nHill   | E <sub>max</sub> |
| hTRP1-WT           | 3.1±0.7          | 1.3±0.4 | 100              | 4.9±0.9          | 1.8±0.5 | 100              |
| H68A               | 3.1±0.4          | 1.1±0.2 | 99.5             | 5.6±0.9          | 1.6±0.4 | 110              |
| H103A              | 2.8±0.4          | 1.3±0.2 | 116.7            | 3.6±0.7          | 1.5±0.4 | 127.8            |
| H136A              | 2.9±0.5          | 1.2±0.3 | 85.3             | 4.1±0.6          | 1.3±0.2 | 93.7             |
| H203A              | N.D.             |         | N.D.             | N.D.             |         | N.D.             |
| H231A              | 2.4±0.9          | 1.1±0.5 | 93.8             | 3.6±0.9          | 1.2±0.3 | 118.5            |
| H244A              | 3.6±0.9          | 1.2±0.3 | 81.6             | 4.1±0.3          | 1.6±0.3 | 103.9            |

Supplemental Table 2, Hu et al. cont.

| Plate #2      | Zinc             |         |                  | FFA              |         |                  |
|---------------|------------------|---------|------------------|------------------|---------|------------------|
| Clones        | EC <sub>50</sub> | nHill   | E <sub>max</sub> | EC <sub>50</sub> | nHill   | E <sub>max</sub> |
| hTRP1-WT      | 2.9±0.5          | 1.2±0.2 | 100              | 4.1±0.9          | 1.1±0.2 | 100              |
| H277A         | 1.1±0.3          | 0.9±0.2 | 37.5             | 9.1±1.2          | 1.7±0.4 | 57.8             |
| H314A         | 0.9±0.2          | 1.5±0.5 | 49.1             | 1.4±0.3          | 1.2±0.3 | 47.2             |
| H321A/H322A   | 1.6±0.3          | 1.8±0.6 | 70.7             | 2.6±0.4          | 1.3±0.2 | 72.5             |
| H380A         | N.D.             |         | N.D.             | N.D.             |         | N.D.             |
| H418A         | 2.1±0.8          | 0.9±0.3 | 52.2             | 7.1±0.5          | 1.5±0.4 | 53.5             |
| H451A         | N.D.             |         | N.D.             | N.D.             |         | N.D.             |
| Plate #3      | Zinc             |         |                  | FFA              |         |                  |
| Clones        | EC <sub>50</sub> | nHill   | E <sub>max</sub> | EC <sub>50</sub> | nHill   | E <sub>max</sub> |
| hTRP1-WT      | 2.0±0.3          | 1.1±0.2 | 100              | 4.3±1.0          | 1.1±0.2 | 100              |
| H481A         | 1.8±0.3          | 1.5±0.3 | 106.3            | 3.3±0.6          | 1.4±0.3 | 99.6             |
| H487A         | 2.2±0.3          | 1.3±0.2 | 92.2             | 4.8±0.9          | 1.1±0.2 | 99.96            |
| H494A         | 1.0±0.6          | 1.4±0.1 | 33.9             | 8.2±1.3          | 1.3±0.3 | 56.5             |
| H512A         | 1.5±0.3          | 1.2±0.3 | 88.2             | 1.9±0.4          | 0.9±0.2 | 85.3             |
| H519A/H520A   | N.D.             |         | N.D.             | N.D.             |         | N.D.             |
| H553A         | N.D.             |         | N.D.             | N.D.             |         | N.D.             |
| Plate #4      | Zinc             |         |                  | FFA              |         |                  |
| Clones        | EC <sub>50</sub> | nHill   | E <sub>max</sub> | EC <sub>50</sub> | nHill   | E <sub>max</sub> |
| hTRP1-WT      | 1.5±0.3          | 1.1±0.2 | 100              | 2.8±0.8          | 1.1±0.3 | 100              |
| H560A         | 2.1±0.5          | 1.5±0.1 | 72.1             | 5.0±1.4          | 1.1±0.3 | 77.5             |
| H585A         | N.D.             |         | N.D.             | N.D.             |         | N.D.             |
| H589A         | N.D.             |         | N.D.             | N.D.             |         | N.D.             |
| H614A         | 0.8±0.4          | 0.9±0.3 | 55.9             | 7.8±0.9          | 0.9±0.2 | 54.9             |
| H700A         | N.D.             |         | N.D.             | N.D.             |         | N.D.             |
| H719A         | N.D.             |         | N.D.             | N.D.             |         | N.D.             |
| H1062A        | 2.1±0.3          | 1.6±0.4 | 87.1             | 2.7±0.3          | 1.2±0.1 | 86.21            |
| H1084A        | 2.5±1.0          | 1.0±0.4 | 85               | 2.7±0.4          | 1.3±0.3 | 92.6             |
| Plate #5      | Zinc             |         |                  | FFA              |         |                  |
| Clones        | EC <sub>50</sub> | nHill   | E <sub>max</sub> | EC <sub>50</sub> | nHill   | E <sub>max</sub> |
| hTRP1-WT      | 2.0±0.3          | 1.5±0.3 | 100              | 1.5±0.2          | 1.4±0.2 | 100              |
| H92A          | 2.0±0.3          | 1.4±0.3 | 98.1             | 1.8±0.4          | 1.4±0.4 | 139.7            |
| H153A         | 2.2±0.5          | 1.6±0.5 | 97.9             | 2.0±0.3          | 1.3±0.3 | 128.5            |
| H224A         | 2.3±0.4          | 1.4±0.3 | 95.3             | 2.2±0.4          | 1.2±0.2 | 120.7            |
| H309A         | 2.9±0.9          | 1.5±0.6 | 88.6             | 2.8±0.2          | 1.1±0.1 | 99.4             |
| H440A         | 2.6±0.4          | 1.3±0.3 | 83.2             | 2.2±0.2          | 1.1±0.1 | 129.6            |
| H570A         | 1.9±0.3          | 1.3±0.3 | 98.9             | 1.6±0.2          | 1.2±0.2 | 130.9            |
| H644A         | 1.8±0.3          | 1.3±0.3 | 89.2             | 1.3±0.1          | 1.1±0.1 | 100.7            |
| H970A         | 0.7±0.2          | 0.9±0.2 | 43.6             | 1.1±0.1          | 1.0±0.1 | 49.2             |
| H1018A        | 2.0±0.6          | 1.4±0.1 | 93.9             | 1.2±1.3          | 1.3±0.3 | 87.5             |
| H1115A/H1116A | 1.9±0.5          | 1.5±0.5 | 94.4             | 1.5±0.4          | 1.3±0.3 | 136.9            |

Supplemental Table 2, Hu et al. cont.

| Plate #6<br>Clones | Zinc             |         |                  | FFA              |         |                  |
|--------------------|------------------|---------|------------------|------------------|---------|------------------|
|                    | EC <sub>50</sub> | nHill   | E <sub>max</sub> | EC <sub>50</sub> | nHill   | E <sub>max</sub> |
| hTRP1-WT           | 2.2±0.3          | 1.3±0.2 | 100              | 4.3±0.7          | 1.4±0.2 | 100              |
| H758A              | 2.6±0.2          | 1.6±0.3 | 125.1            | 3.1±0.4          | 1.5±0.3 | 121.1            |
| H829A              | 2.5±0.4          | 1.1±0.2 | 115.3            | 4.6±1.2          | 1.1±0.5 | 113.4            |
| H933A              | 1.8±0.4          | 1.5±0.4 | 105.1            | 3.0±0.9          | 2.6±0.7 | 104.8            |
