# Supplementary material
Source: PubMed Central journal article supplement (PMC2677965)

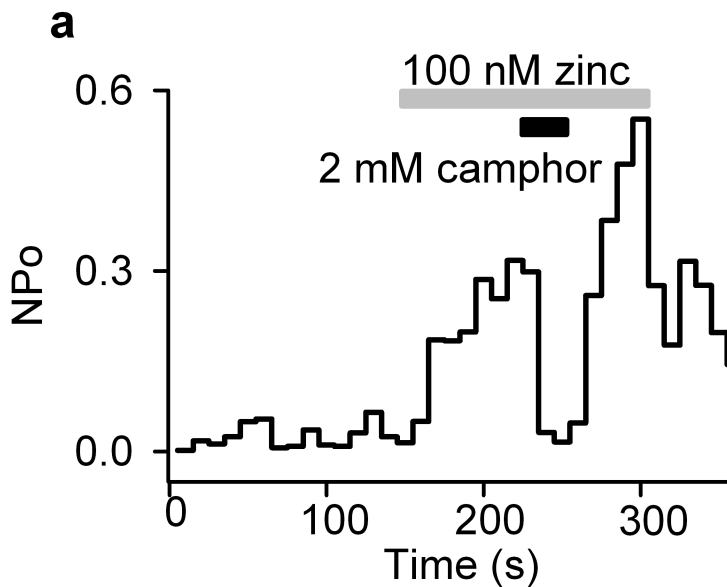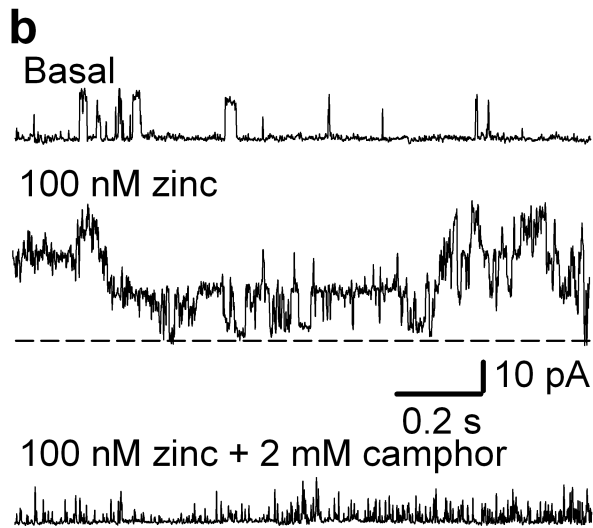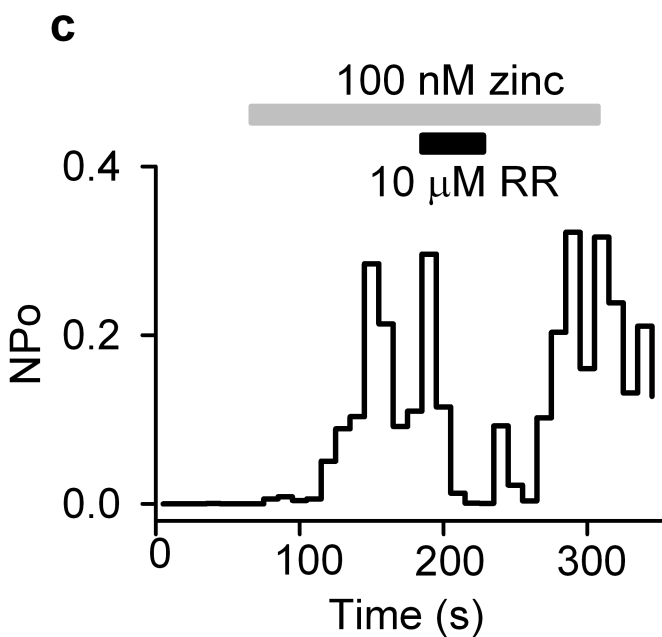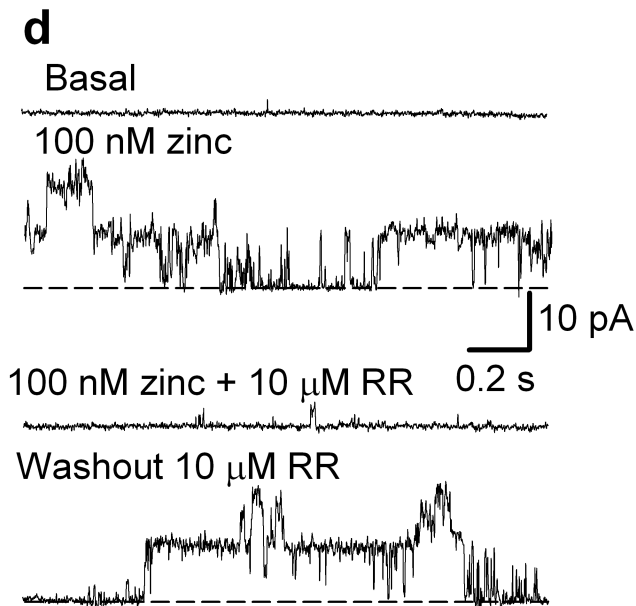

Supplement: NIHMS106118-supplement-suppl_Figure_1.pdf [file NIHMS106118-supplement-suppl_Figure_1.pdf]

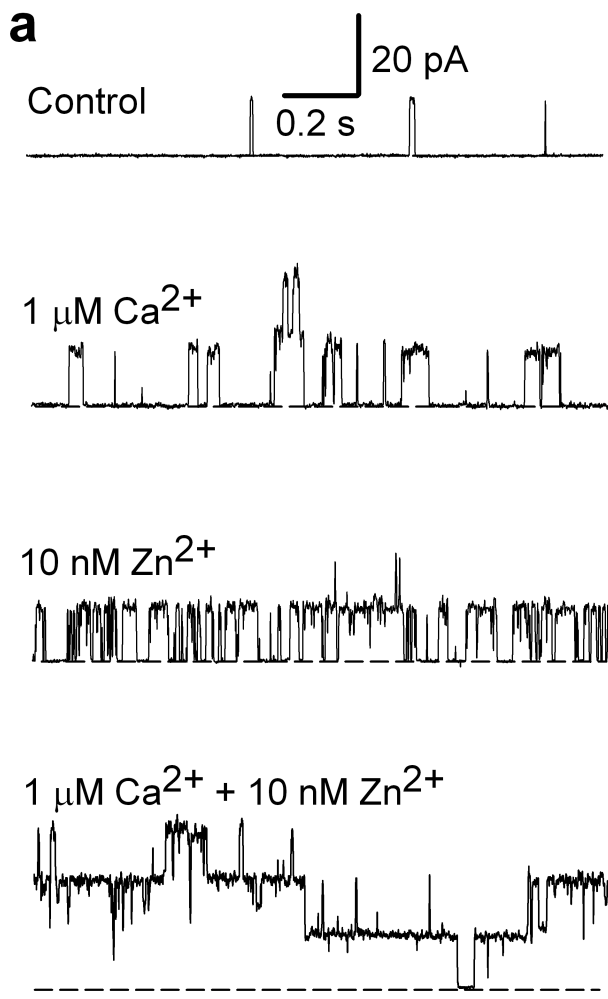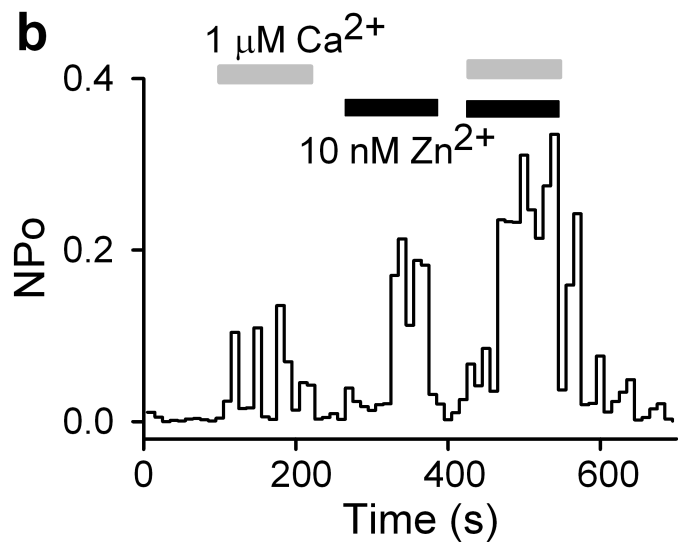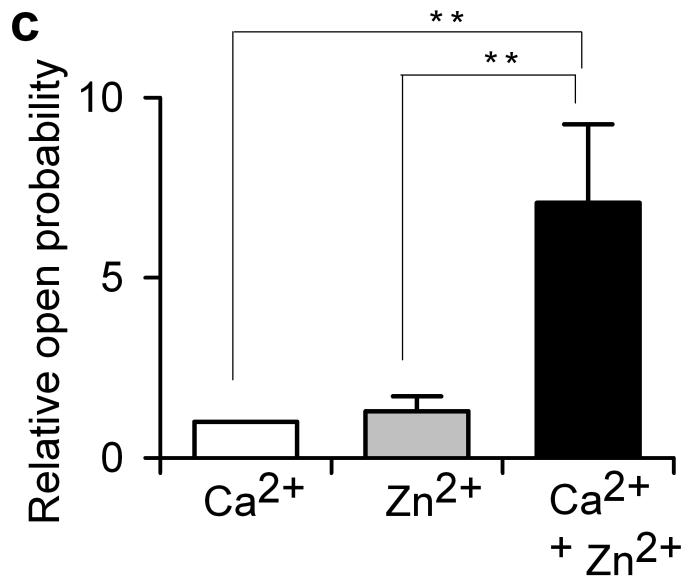

Supplement: NIHMS106118-supplement-suppl_Figure_2.pdf [file NIHMS106118-supplement-suppl_Figure_2.pdf]

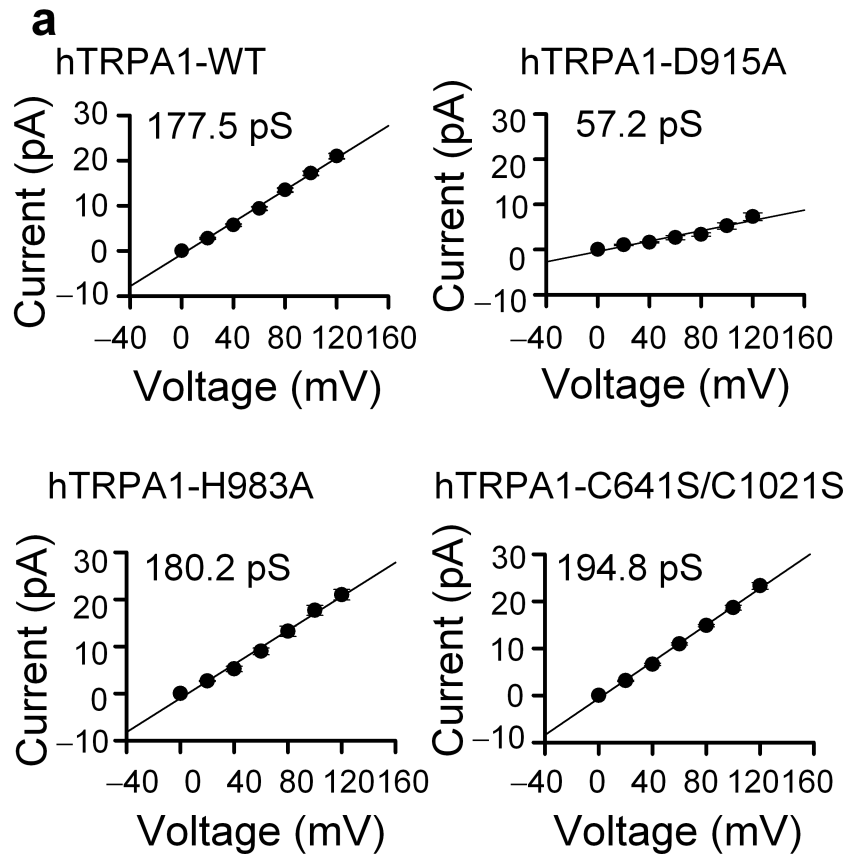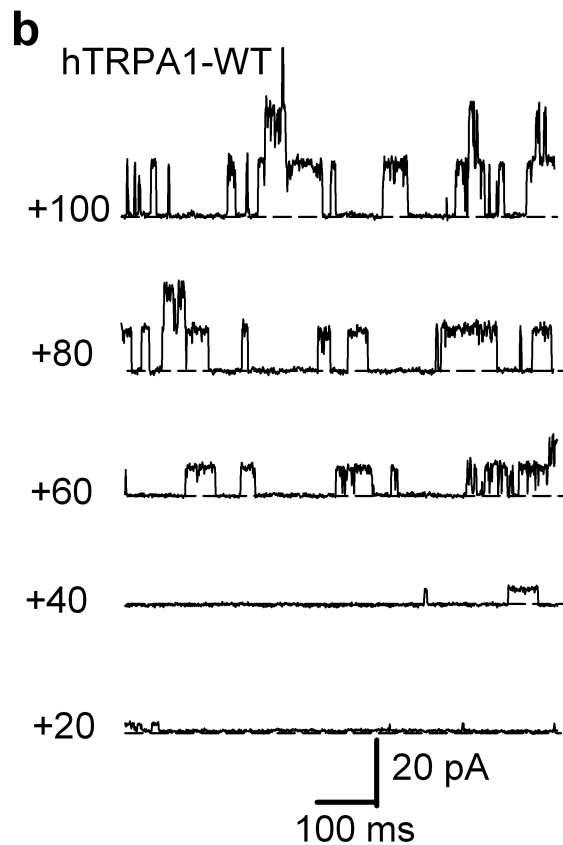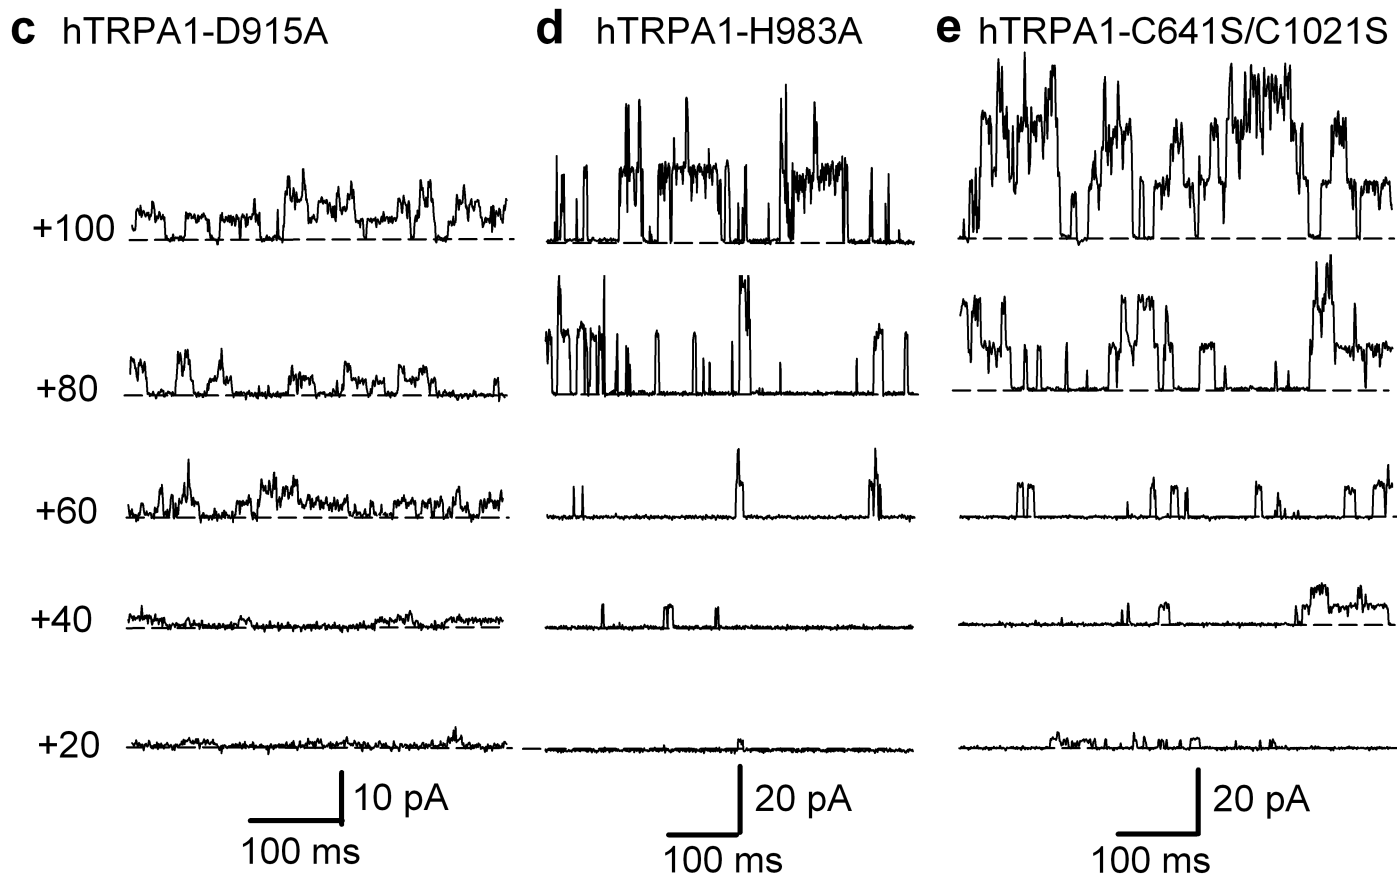

Supplement: NIHMS106118-supplement-suppl_Figure_4.pdf [file NIHMS106118-supplement-suppl_Figure_4.pdf]

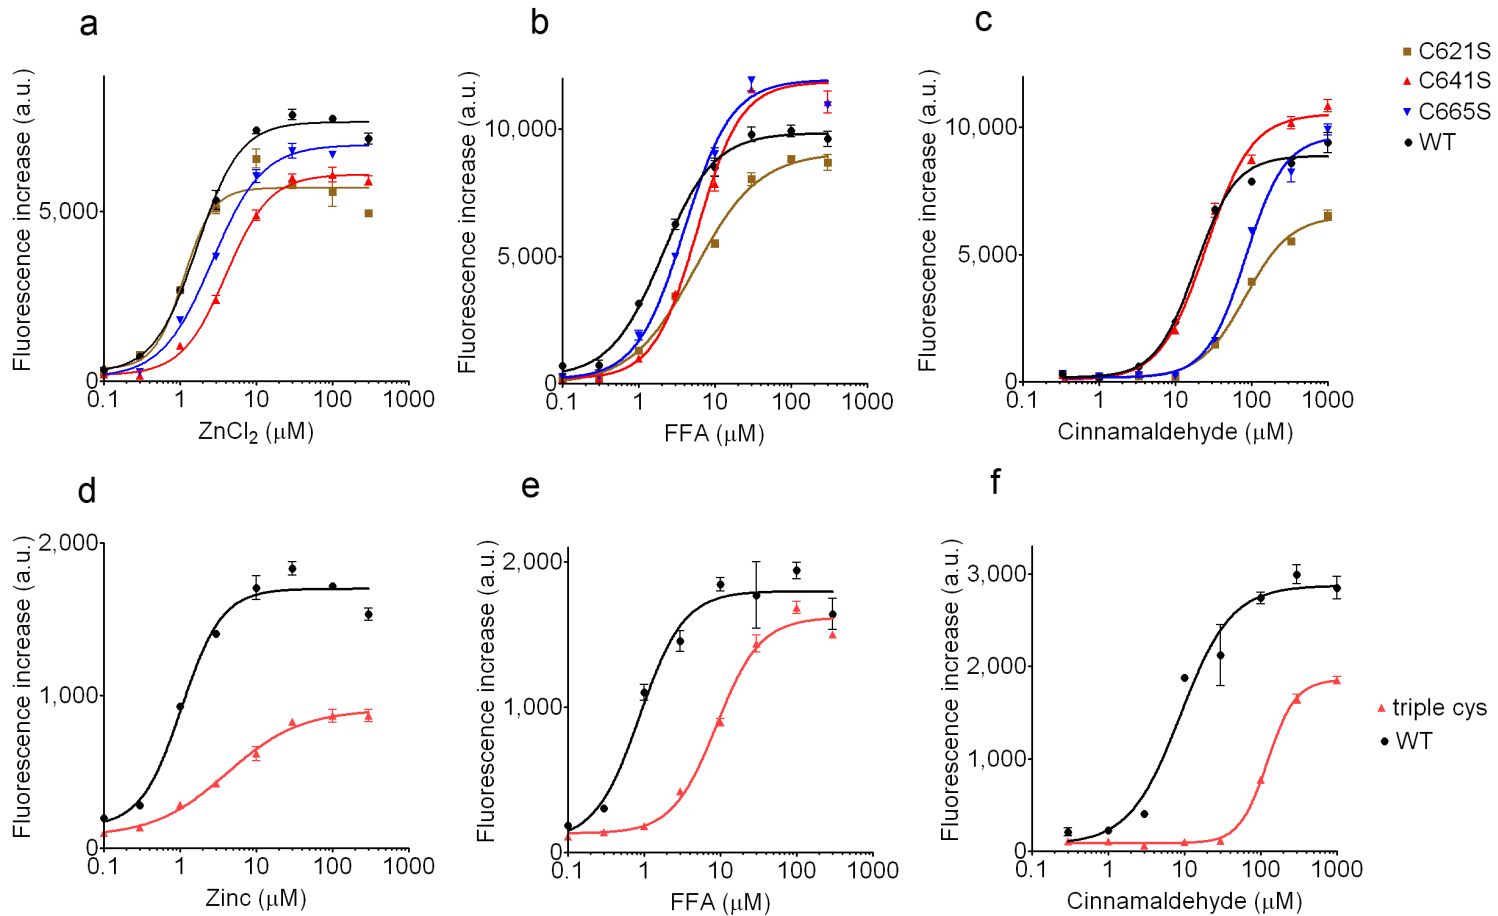

Supplement: NIHMS106118-supplement-suppl_Figure_5.pdf [file NIHMS106118-supplement-suppl_Figure_5.pdf]
